# Supplementary material for: Silica-decorated Ni–Zn alloy as a highly active and selective catalyst for acetylene semihydrogenation
Source: Royal Society of Chemistry journal article supplement (doi:10.1039/d1cy00709b), 2021-01-01
Supplement: d1cy00709b1.pdf [file d1cy00709b1.pdf]

## Supporting Information

# Silica-decorated Ni–Zn alloy as a highly active and selective catalyst for acetylene semihydrogenation

Wiyanti F. Simanullang,<sup>a,†</sup> Jiamin Ma,<sup>a,†</sup> Ken-ichi Shimizu,<sup>a,b</sup>

Shinya Furukawa,<sup>\*,a,b,c</sup>

<sup>a</sup> *Institute for Catalysis, Hokkaido University, N-21, W-10, Sapporo 001-0021, Japan*

<sup>b</sup> *Elements Strategy Initiative for Catalysts and Batteries, Kyoto University, Katsura, Kyoto 615-8520, Japan*

<sup>c</sup> *Japan Science and Technology Agency, PRESTO, Chiyoda-ku, Tokyo 102-0076, Japan*

*E-mail: furukawa@cat.hokudai.ac.jp,*

*Tel: +81-11-706-9162, Fax: +81-11-706-9163*

<sup>†</sup> These authors equally contributed.

## Experimental details

### Catalyst Preparation

Ni and Ni–Zn alloy nanoparticles supported on silica (Ni/SiO<sub>2</sub> and Ni–Zn/SiO<sub>2</sub>, Ni loading: 2 wt%) were prepared by pore-filling impregnation method. Aqueous solution of Ni (NO<sub>3</sub>)<sub>3</sub>·6H<sub>2</sub>O (Wako, 99%) alone or Ni (NO<sub>3</sub>)<sub>3</sub>·6H<sub>2</sub>O and Zn (NO<sub>3</sub>)<sub>2</sub>·6H<sub>2</sub>O (Wako, 99%) with molar ratio 1:1 were added to dried silica gel (CARiACT G-6, Fuji Silysia,  $S_{\text{BET}} = 470 \text{ m}^2\text{g}^{-1}$ ) so that the solutions filled the silica pores. The mixtures were sealed overnight at room temperature and dried over liquid nitrogen under vacuum overnight followed by drying at 90°C. The reduction under flowing H<sub>2</sub> at 600 °C for 1 h was then performed. Silica decorated Ni (Si–Ni/SiO<sub>2</sub>) and Ni–Zn nanoparticles supported on silica (Si–Ni–Zn/SiO<sub>2</sub>) were prepared by adding ethanol solution of C<sub>18</sub>H<sub>16</sub>OSi (Mr = 276.40 g mol<sup>-1</sup>, Tokyo Chemical Industry Co., Ltd) and Ni (NO<sub>3</sub>)<sub>3</sub>·6H<sub>2</sub>O (Wako, 99%) with Zn (NO<sub>3</sub>)<sub>2</sub>·6H<sub>2</sub>O (Wako, 99%) in a similar fashion to that of Ni/SiO<sub>2</sub> or Ni–Zn/SiO<sub>2</sub> except drying over the hot plate. The specific surface area of the prepared catalysts were as follows: Ni–Zn/SiO<sub>2</sub>,  $S_{\text{BET}} = 454 \text{ m}^2\text{g}^{-1}$ ; Si–Ni–Zn/SiO<sub>2</sub>,  $S_{\text{BET}} = 451 \text{ m}^2\text{g}^{-1}$ , indicating that the silica-decoration did not decrease the surface area.

### Reaction condition

The catalytic activities of the prepared catalysts were tested in hydrogenation of acetylene. The mixture of Ni-based catalysts (15 mg) and quartz sand (Miyazaki Chemical Co., 250 ~ 420 μm, 2 g) was filled into a quartz glass tube (internal diameter, 10 mm) and put in a fixed bed continuous reactor. Prior to the activity test, the catalyst was reduced under flowing H<sub>2</sub> (10 mL min<sup>-1</sup>) at 500°C for 0.5 h and the temperature was cooled down to the reaction temperature. The reaction was initiated by flowing the gas mixture: (C<sub>2</sub>H<sub>2</sub>:H<sub>2</sub>:He = 2:20:10 mL min<sup>-1</sup>: GHSV = 128,000 mL h<sup>-1</sup> g<sup>-1</sup>). The gas phase was analyzed by an online thermal conductivity detector (TCD) gas chromatography (Shimadzu GC-8A) equipped downstream connected to the Unipack S packed column. The catalytic performance (C<sub>2</sub>H<sub>2</sub> conversion and C<sub>2</sub>H<sub>4</sub> selectivity) at 15 min on stream was reported. For the stability test, 60 mg of catalyst was used. C<sub>2</sub>H<sub>2</sub> conversion and C<sub>2</sub>H<sub>4</sub> selectivity were calculated using the following equations:

$$\text{C}_2\text{H}_2 \text{ conversion (\%)} = (F_{\text{C}_2\text{H}_2,\text{in}} - F_{\text{C}_2\text{H}_2,\text{out}}) / F_{\text{C}_2\text{H}_2,\text{in}} \times 100$$

$$\text{C}_2\text{H}_4 \text{ selectivity (\%)} = F_{\text{C}_2\text{H}_4,\text{out}} / (F_{\text{C}_2\text{H}_2,\text{in}} - F_{\text{C}_2\text{H}_2,\text{out}}) \times 100$$

### Characterization

The crystal structure of the prepared catalyst was examined by powder X-ray diffraction (XRD) using

a Rigaku MiniFlex II/AP diffractometer with Cu K $\alpha$  radiation.

High-angle annular dark field scanning transmission electron microscopy (HAADF-STEM) was carried out using a JEOL JEM-ARM200 M microscope equipped with an energy dispersive X-ray (EDX) analyzer (EX24221M1G5T). STEM analysis was performed at an accelerating voltage of 200 kV. To prepare the TEM specimen, all samples were sonicated in ethanol and then dispersed on a Mo grid supported by an ultrathin carbon film.

Reduction properties of the as-prepared catalyst were analyzed by temperature programmed reduction method by H<sub>2</sub> (H<sub>2</sub>-TPR) by using a BELCAT- II instrument. Prior to analysis, 30 mg of catalyst was pretreated at 150°C for 1 h under inert He flow to remove absorbed water, then the sample was heated under H<sub>2</sub> flow (5v% H<sub>2</sub> balanced with Ar 30 sccm) in the temperature from 50°C to 900°C at a ramping rate of 2°C/min<sup>-1</sup>.

### **Computational Details**

Periodic density functional theory (DFT) calculations, except frequency calculations, were performed using the CASTEP code<sup>1</sup> with Vanderbilt-type ultrasoft pseudopotentials<sup>2</sup> and a revised Perdew–Burke–Ernzerhof exchange-correlation functional (RPBE)<sup>3</sup> based on the generalized gradient approximation (GGA). The plane-wave basis set was truncated at a kinetic energy of 370 eV. A Fermi smearing of 0.1 eV was utilized. The reciprocal space was sampled using a *k*-point mesh with a typical spacing of 0.04 Å<sup>-1</sup> generated by the Monkhorst–Pack scheme.<sup>4</sup> Geometry optimizations were performed in supercell structures using periodic boundary conditions. Surfaces were modeled using 4 atomic layer-thick metallic slabs. An L1<sub>2</sub>-type Ni<sub>3</sub>Zn structure was considered as the model of the Ni<sub>0.75</sub>Zn<sub>0.25</sub> alloy. The surface was modeled using Ni<sub>3</sub>Zn(111) and Ni<sub>3</sub>Zn(211) planes for the terrace and step sites of Ni–Zn, respectively, with a 13 Å vacuum region. Convergence criteria comprised a) a self-consistent field (SCF) tolerance of 1.0×10<sup>-6</sup> eV/atom, b) an energy tolerance of 1.0×10<sup>-5</sup> eV/atom, c) a maximum force tolerance of 0.05 eV Å<sup>-1</sup>, and d) a maximum displacement tolerance of 1.0×10<sup>-3</sup> Å for structure optimization and energy calculation. Frequency calculations of adsorbed CO

molecules were conducted by the DMol<sup>3</sup> code<sup>5</sup> based on the aforementioned optimized structures. These calculations involved the RPBE functional, a double-numeric quality basis set with polarization functions (DNP, comparable to Gaussian 6-311G<sup>\*\*</sup>)<sup>6</sup> with a real-space cutoff of 4.2 Å, DFT semi-core pseudopotential core treatment,<sup>7</sup> and a Fermi smearing of 0.1 eV. The SCF convergence was accelerated using the iterative scheme proposed by Kresse and Furthmüller.<sup>8</sup> The partial Hessian matrix including C and O atoms was computed to evaluate the harmonic frequencies for adsorbed CO. All computed harmonic frequencies were scaled by an empirical factor of 1.056, which corresponds to the ratio of experimental<sup>9</sup> and computed values for gas-phase CO (2143 cm<sup>-1</sup>/2028.7 cm<sup>-1</sup>).

### Supplementary Figures

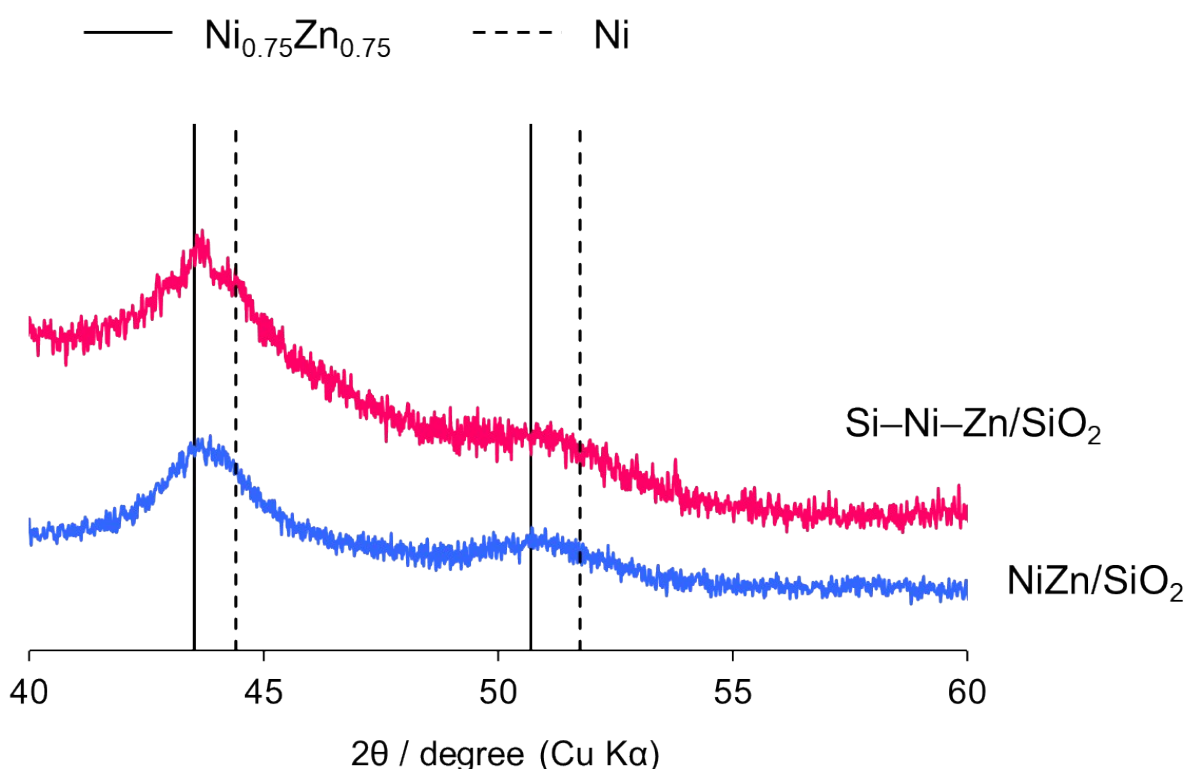

**Fig. S1.** XRD patterns of Ni-Zn/SiO<sub>2</sub> and Si-Ni-Zn/SiO<sub>2</sub>. References are shown as black vertical lines.

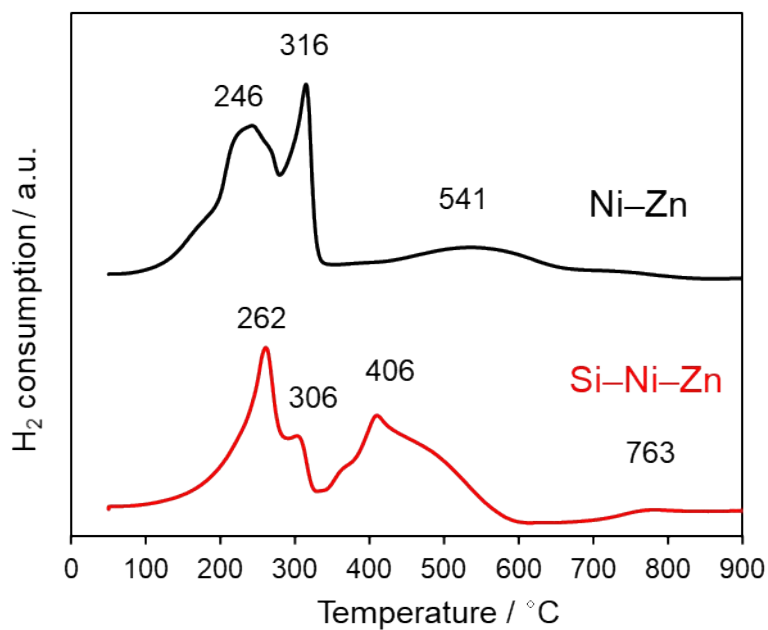

**Fig. S2.** H<sub>2</sub>-TPR profiles of Ni-Zn/SiO<sub>2</sub> and Si-Ni-Zn/SiO<sub>2</sub>.

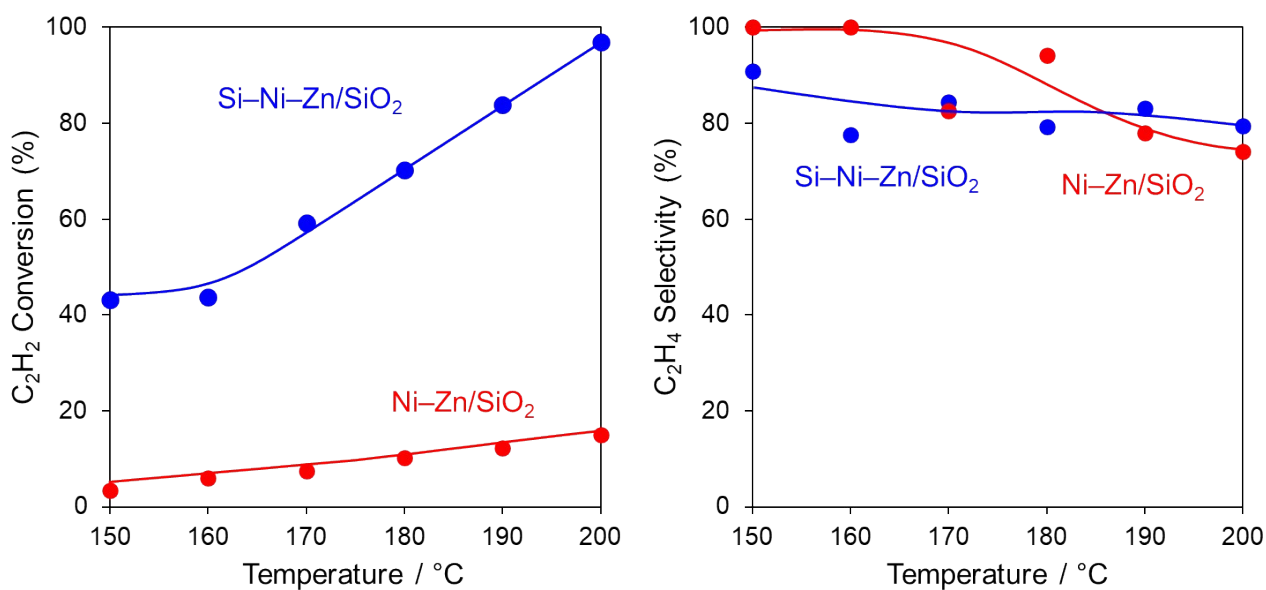

**Fig. S3.** Temperature-dependences of C<sub>2</sub>H<sub>2</sub> conversion and C<sub>2</sub>H<sub>4</sub> selectivity for Ni-Zn/SiO<sub>2</sub> and Si-Ni-Zn/SiO<sub>2</sub> catalysts.

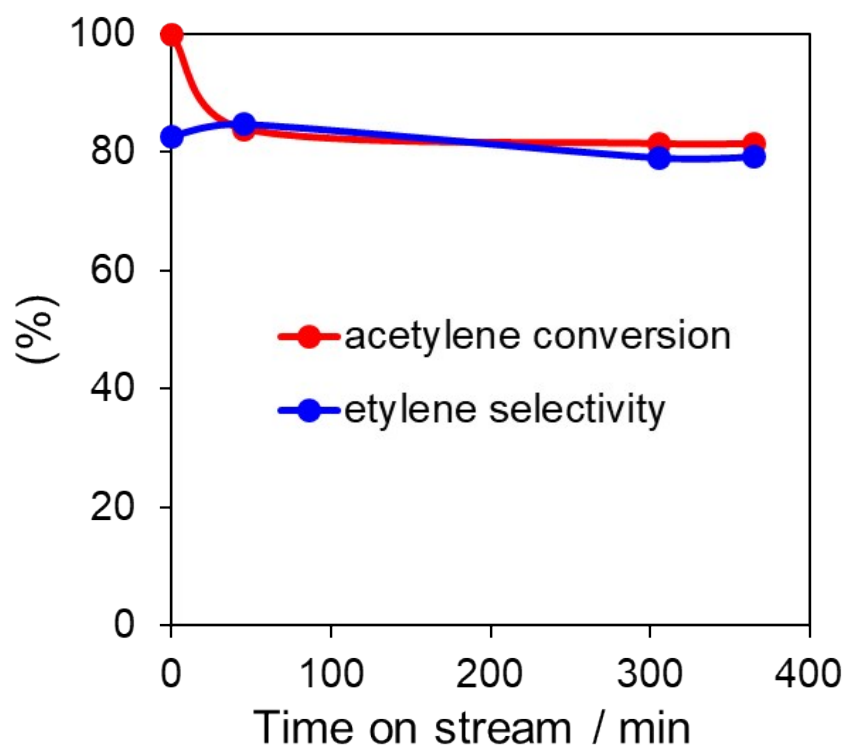

**Fig. S4.** Stability test for acetylene semihydrogenation using Si-Ni-Zn/SiO<sub>2</sub>.

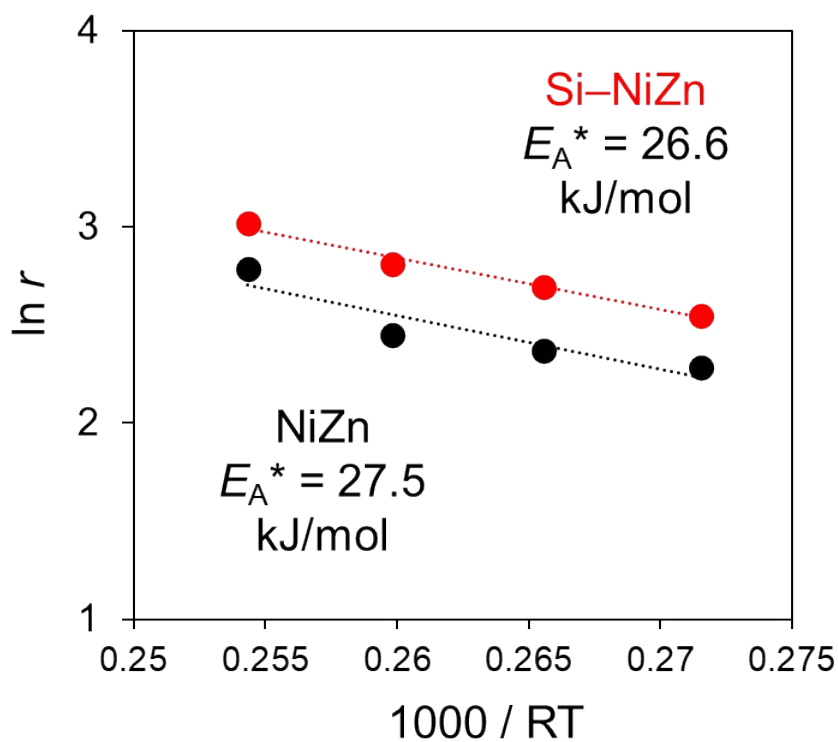

**Fig. S5.** Arrhenius-type plots obtained in acetylene semihydrogenation on Ni-Zn/SiO<sub>2</sub> and Si-Ni-Zn/SiO<sub>2</sub>.

**Table S1.** Summary of the catalytic performance of Ni-based catalyst in acetylene semihydrogenation.

| entry | catalyst                                            | Ni wt%            | amount / mg | C <sub>2</sub> H <sub>2</sub> flow / mLmin <sup>-1</sup> | C <sub>2</sub> H <sub>2</sub> :H <sub>2</sub> :C <sub>2</sub> H <sub>4</sub> :He(Ar) / mLmin <sup>-1</sup> | GHSV / mLg <sup>-1</sup> h <sup>-1</sup> | conv. (%) | sel. (%) | temp. / °C | specific rate / mL <sub>C<sub>2</sub>H<sub>2</sub></sub> min <sup>-1</sup> g <sub>Ni</sub> <sup>-1</sup> | ref       |
|-------|-----------------------------------------------------|-------------------|-------------|----------------------------------------------------------|------------------------------------------------------------------------------------------------------------|------------------------------------------|-----------|----------|------------|----------------------------------------------------------------------------------------------------------|-----------|
| 1     | Si-Ni-Zn/SiO <sub>2</sub>                           | 2                 | 15          | 2                                                        | 2:20:0:10                                                                                                  | 128,000                                  | 97        | 80       | 200        | 6,467                                                                                                    | this work |
| 2     | NiCu <sub>0.125</sub> /MCM-41                       | 1                 | 100         | 3.3                                                      | 3.3:10:0:0                                                                                                 | 8,000                                    | 100       | 63       | 250        | 3,333                                                                                                    | 10        |
| 3     | AgNi <sub>0.125</sub> /SiO <sub>2</sub>             | 0.37              | 30          | 0.3                                                      | 0.3:6:6:17.7                                                                                               | 60,000                                   | 98        | 25       | 200        | 2,649                                                                                                    | 11        |
| 4     | Ni <sub>3</sub> Ge/MCM-41                           | 3.2               | 15.6        | 3.9                                                      | 3.9:8.1:0:17                                                                                               | 111,360                                  | 30        | 87       | 250        | 2340                                                                                                     | 12        |
| 5     | Ni-Zn/SiO <sub>2</sub>                              | 2                 | 15          | 2                                                        | 2:20:0:10                                                                                                  | 128,000                                  | 15        | 80       | 200        | 1,007                                                                                                    | this work |
| 6     | NiGa                                                | 10                | 50          | 1.2                                                      | 1.2:12:24:82.5                                                                                             | 144,000                                  | 90        | 82       | 190        | 216                                                                                                      | 13        |
| 7     | Ni <sub>3</sub> Ga/MgAl <sub>2</sub> O <sub>4</sub> | 2                 | 100         | 0.33                                                     | 0.33:6.7:33.3:26.67                                                                                        | 40,000                                   | 92        | 77       | 220        | 153                                                                                                      | 14        |
| 8     | Ni/MCM-41                                           | 25                | 100         | 3.7                                                      | 3.7:7.4:0:55.5                                                                                             | 40,000                                   | 96        | 87       | 240        | 142                                                                                                      | 15        |
| 9     | Ni-CeO <sub>2</sub>                                 | 1.54              | 200         | 0.35                                                     | 0.35:24.5:1.4:43.75                                                                                        | 21,000                                   | 100       | 100      | 200        | 114                                                                                                      | 16        |
| 10    | Ni <sub>6</sub> In/SiO <sub>2</sub>                 | 8                 | 500         | 3                                                        | 3:30:0:267                                                                                                 | 36,000                                   | 100       | 64       | 200        | 75                                                                                                       | 17        |
| 11    | Na-Ni/CHA                                           | 3.5               | 200         | 0.5                                                      | 0.5:8:0:41.5                                                                                               | 15,000                                   | 100       | 97       | 170        | 71                                                                                                       | 18        |
| 12    | Ni-SAs/N-C                                          | 5.67 <sup>a</sup> | 400         | 0.2                                                      | 0.2:4:20:15.8                                                                                              | 6,000                                    | 96        | 91       | 200        | 8                                                                                                        | 19        |

<sup>a</sup> Although the loading amount of Ni was not reported, it was estimated from the original Ni content<sup>20</sup> and the weight loss by TG.

## Supplementary references

1. M. D. Segall, P. J. D. Lindan, M. J. Probert, C. J. Pickard, P. J. Hasnip, S. J. Clark, M. C. Payne, *J. Phys. Condens. Matter* 2002, **14**, 2717–2744.
2. D. Vanderbilt, *Phys. Rev. B* 1990, **41**, 7892–7895.
3. B. Hammer, L. B. Hansen, J. K. Norskov, *Phys. Rev. B* 1999, **59**, 7413–7421.
4. H. J. Monkhorst, J. D. Pack, *Phys. Rev. B* 1976, **13**, 5188–5192.
5. B. Delley, *J. Chem. Phys.* 1990, **92**, 508–517.
6. Y. Inada, H. Orita, *J. Comput. Chem.* 2008, **29**, 225–232.
7. B. Delley, *Phys. Rev. B* 2002, **66**, 155125.
8. G. Kresse, J. Furthmuller, *Phys. Rev. B* 1996, **54**, 11169–11186.
9. D. Scarano, S. Bordiga, C. Lamberti, G. Spoto, G. Ricchiardi, A. Zecchina, C. O. Arean, *Surf. Sci.* 1998, **411**, 272–285.
10. S. Zhou, L. Kang, X. Zhou, Z. Xu, M. Zhu, *Nanomaterials*, 2020, **10**, 509.
11. G. Xian, P. Xiao, Y. Liu, A. Wang, Y. Su, L. Li, T. Zhang, *Appl. Catal. A: Gen.*, 2017, **545**, 90–96.
12. T. Komatsu, K. Sou, K. Ozawa, *J. Mol. Catal. A: Chem.*, 2010, **319**, 71–77.
13. Y. Cao, H. Zhang, S. Ji, Z. Sui, Z. Jiang, D. Wang, Y. Li, *Angew. Chem. Int. Ed.*, 2020, **132**, 11744–11749.
14. Y. Liu, X. Liu, Q. Feng, D. He, L. Zhang, C. Lian, R. Shen, G. Zhao, Y. Ji, D. Wang, G. Zhou, Y. Li, *Adv. Mater.*, 2016, **28**, 4747–4754.
15. J. Zhao, L. He, J. Yu, Y. Shi, R. Miao, Q. Guan, P. Ning, *New J. Chem.*, 2021, **45**, 1054–1062.
16. C. Riley , A. D. La Riva , S. Zhou , Q. Wan , E. J. Peterson , K. Artyushkova , M. D. Farahani , H. B. Friedrich , L. K. Burkemper and N. Atudorei , *ChemCatChem*, 2019, **11** , 1526–1533.
17. Y. Chen, J. Chen, *Appl. Surf. Sci.*, 2016, **387**, 16-27.
18. Y. Chai, G. Wu, X. Liu, Y. Ren, W. Dai, C. Wang, Z. Xie, N. Guan, L. Li, *J. Am. Chem. Soc.* 2019, **141**, 9920–992.
19. X. Dai, Z. Chen, T. Yao, L. Zheng, Y. Lin, W. Liu, H. Ju, J. Zhu, X. Hong, S. Wei, Y. Wu and Y. Li, *Chem. Commun.*, 2017, **53**, 11568–11571.
20. R. Li, X. Ren, X. Feng, X. Li, C. Hu, B. Wang, *Chem. Commun.*, 2014, **50**, 6894-6897.
